# Supplementary material for: Factors Impacting Seafarers’ Mental Health and Career Intentions
Source: PubMed Central journal article supplement — Inquiry. 2024 Mar 26;61:00469580241229617. doi: 10.1177/00469580241229617 (PMC10966976; doi:10.1177/00469580241229617), 2024-03-26
Supplement: sj-pdf-1-inq-10.1177_00469580241229617.pdf [file sj-pdf-1-inq-10.1177_00469580241229617.pdf]

## Seafarers Well-being and Mental Health Survey<sup>1</sup>

This research is conducted under the research project [masked for anonymisation reasons]. We are committed to studying how mental health conditions in working seafarers are. This questionnaire will help us to learn about factors related to seafarers' mental health during their work on board.

Your participation in this research would be invaluable to get familiar to challenges seafarers are facing while they are performing their duty on-board.

Participation in this research is completely anonymous, we are not asking for your name or any kind of personal identifying information.

Below there are a series of questions related to your life and problems you may have encountered while on-board. Please read them carefully and answer them honestly. There are no right or wrong answers. You can stop anytime you want, without any consequences. The data will be saved anonymously and will be used only for the purpose of this project. Should you have any questions concerning this study or problems you may have encountered while on-board, you may contact [masked for anonymisation reasons]

Please tick this box if you agree with the terms and conditions of this study.

### Part 1. Orientation, Demographical Data, General Working Conditions & Motivation For Work

|                    |
|--------------------|
| <b>1. Your age</b> |
|                    |

|                                          |
|------------------------------------------|
| <b>2. Where were you born? (country)</b> |
|                                          |

|                               |        |
|-------------------------------|--------|
| <b>3. What is your gender</b> |        |
| Male                          | Female |

|                                                       |        |         |       |
|-------------------------------------------------------|--------|---------|-------|
| <b>4. In what Department do you work on the ship?</b> |        |         |       |
| Deck                                                  | Engine | Steward | Other |

|                                          |
|------------------------------------------|
| <b>5. What is your rank on the ship?</b> |
| Master/Captain                           |
| Officer                                  |
| Raiting                                  |

---

<sup>1</sup> The survey was published online; formatting was adapted accordingly

|       |
|-------|
| Other |
|-------|

|                                             |
|---------------------------------------------|
| <b>6. What type of ship do you work on?</b> |
| Container Ship                              |
| Bulk Carrier                                |
| Ro-Ro                                       |
| Reefer                                      |
| Dry Cargo                                   |
| Passenger Ship/Ferry                        |
| Oil Tanker                                  |
| Chemical and Product Tanker                 |
| Gas Tanker (LNG)                            |
| Other Tanker                                |
| Supply Ship                                 |
| Other                                       |

|                                                         |   |   |   |    |            |
|---------------------------------------------------------|---|---|---|----|------------|
| <b>7. How many months have you been away from home?</b> |   |   |   |    |            |
| 2                                                       | 4 | 6 | 8 | 10 | 12 & above |

|                                                          |
|----------------------------------------------------------|
| <b>8. What route (Region) are you currently sailing?</b> |
| Ocean Routes                                             |
| Offshore Routes                                          |

|                                                         |
|---------------------------------------------------------|
| <b>9. How many years have you worked as a seafarer?</b> |
| 0-2 years                                               |
| 3-5 years                                               |
| 6-10 years                                              |
| 11-15 years                                             |
| More than 15 years                                      |

|                                                 |
|-------------------------------------------------|
| <b>10. What motivated you to start sailing?</b> |
| Money                                           |
| Travelling                                      |
| Love sailing                                    |
| Advice from families or friends                 |
| Have no better choice                           |
| Others:                                         |

|                                                      |
|------------------------------------------------------|
| <b>11. What motivates you to stay with this job?</b> |
|------------------------------------------------------|

|                                  |
|----------------------------------|
| Money                            |
| Sense of achievement             |
| Travelling                       |
| Career Development               |
| Support from families or friends |
| Love sailing                     |
| Have no better choice            |
| Others:                          |

|                                               |
|-----------------------------------------------|
| <b>12. What is your normal duty schedule?</b> |
| 4 hours on, 8 hours off                       |
| 6 hours on, 6 hours off                       |
| 8 hours on, 8 hours off                       |
| Other                                         |

|                                                                            |   |   |   |   |
|----------------------------------------------------------------------------|---|---|---|---|
| <b>13. How much are you exposed to the following while working at sea?</b> |   |   |   |   |
| <b>0= not at all, 1= rarely, 2= often, 3= most of the time</b>             |   |   |   |   |
| noise                                                                      | 0 | 1 | 2 | 3 |
| vibration                                                                  | 0 | 1 | 2 | 3 |
| work in tight spaces                                                       | 0 | 1 | 2 | 3 |
| working alone                                                              | 0 | 1 | 2 | 3 |
| lack of personal protective equipment                                      | 0 | 1 | 2 | 3 |
| sharp objects                                                              | 0 | 1 | 2 | 3 |
| heavy lifting                                                              | 0 | 1 | 2 | 3 |
| heat                                                                       | 0 | 1 | 2 | 3 |
| chemicals                                                                  | 0 | 1 | 2 | 3 |
| dust                                                                       | 0 | 1 | 2 | 3 |
| smoke                                                                      | 0 | 1 | 2 | 3 |
| physical injuries                                                          | 0 | 1 | 2 | 3 |
| viruses and diseases                                                       | 0 | 1 | 2 | 3 |
| seasickness                                                                | 0 | 1 | 2 | 3 |
| homesickness                                                               | 0 | 1 | 2 | 3 |
| mobbing                                                                    | 0 | 1 | 2 | 3 |
| not allowed to get off the ship even when in port                          | 0 | 1 | 2 | 3 |
| other                                                                      | 0 | 1 | 2 | 3 |

|                                                                              |
|------------------------------------------------------------------------------|
| <b>14. Do you perform work tasks for which you would need more training?</b> |
| Never                                                                        |
| Seldom                                                                       |

|                  |
|------------------|
| Often            |
| Most of the time |

|                                           |
|-------------------------------------------|
| <b>15.Can you set your own work pace?</b> |
| Never                                     |
| Seldom                                    |
| Often                                     |
| Most of the time                          |

|                                                       |    |
|-------------------------------------------------------|----|
| <b>16.Does your company take care of its workers?</b> |    |
| Yes                                                   | No |

|                                                                               |    |
|-------------------------------------------------------------------------------|----|
| <b>17.In the past year, have you gotten sick while working as a seafarer?</b> |    |
| Yes                                                                           | No |

**Part 2. General Health Issues**

|                                                         |
|---------------------------------------------------------|
| <b>18.In general, how would you say your health is?</b> |
| Excellent                                               |
| Very good                                               |
| Good                                                    |
| Fair                                                    |
| Poor                                                    |

|                                                                   |     |    |
|-------------------------------------------------------------------|-----|----|
| <b>19.Have you ever been diagnosed with any of the following:</b> |     |    |
| High cholesterol                                                  | yes | no |
| High blood pressure                                               | yes | no |
| Heart problems                                                    | yes | no |
| Sleep disorder                                                    | yes | no |
| Diabetes                                                          | yes | no |
| Cancer                                                            | yes | no |
| Liver problems                                                    | yes | no |
| Depression                                                        | yes | no |
| Anxiety                                                           | yes | no |
| other _____                                                       |     |    |

|                                                           |
|-----------------------------------------------------------|
| <b>20.How often do you exercise while working at sea?</b> |
| Never                                                     |
| Less than 4 times per month                               |

|                            |
|----------------------------|
| 1 to 2 times per week      |
| More than 3 times per week |

**Part 3. SCL-90<sup>2</sup> Depression, Anxiety, Hostility, Interpersonal Sensitivity, Somatisation**

For each statement in the table below, check the box that is closest to how you have been feeling over the **last week**:

(0= not at all, 1= a little bit, 2= moderately, 3= quite a lot, 4= extremely)

|                       |   |   |   |   |   |
|-----------------------|---|---|---|---|---|
| <b>21. Depression</b> |   |   |   |   |   |
| 13 items              | 0 | 1 | 2 | 3 | 4 |

|                    |   |   |   |   |   |
|--------------------|---|---|---|---|---|
| <b>22. Anxiety</b> |   |   |   |   |   |
| 10 items           | 0 | 1 | 2 | 3 | 4 |

|                      |   |   |   |   |   |
|----------------------|---|---|---|---|---|
| <b>23. Hostility</b> |   |   |   |   |   |
| 6 items              | 0 | 1 | 2 | 3 | 4 |

|                                      |   |   |   |   |   |
|--------------------------------------|---|---|---|---|---|
| <b>24. Interpersonal sensitivity</b> |   |   |   |   |   |
| 9 items                              | 0 | 1 | 2 | 3 | 4 |

|                         |   |   |   |   |   |
|-------------------------|---|---|---|---|---|
| <b>25. Somatisation</b> |   |   |   |   |   |
| 12 items                | 0 | 1 | 2 | 3 | 4 |

**Part 4. Sources Of Anxiety And Social Support**

How much you believe each of the following may contribute to your mood when you feel down or depressed.

Please check the box that is closest to your feeling.

(0= not at all, 1= rarely, 2= often, 3= most of the time)

|                                      |   |   |   |   |
|--------------------------------------|---|---|---|---|
| <b>26.</b>                           |   |   |   |   |
| 1 Working Alone                      | 0 | 1 | 2 | 3 |
| 2 Cultural difference at work        | 0 | 1 | 2 | 3 |
| 3 Food quality                       | 0 | 1 | 2 | 3 |
| 4 Amount of food available           | 0 | 1 | 2 | 3 |
| 5 Isoletation from family or friends | 0 | 1 | 2 | 3 |
| 6 Lenght of contract                 | 0 | 1 | 2 | 3 |
| 7 Shift work                         | 0 | 1 | 2 | 3 |
| 8 Trouble sleeping                   | 0 | 1 | 2 | 3 |

<sup>2</sup> SCL-90 is a scale introduced by Derogatis & Cleary in the Journal of Clinical Psychology, 1977, 33(4), pp. 981-989. The whole scale is published elsewhere; below, only the number of items are shown for each of the five sub-scales used in the survey.

|                                            |   |   |   |   |
|--------------------------------------------|---|---|---|---|
| 9 Supervisors demands                      | 0 | 1 | 2 | 3 |
| 10 Mobbing from co-workers                 | 0 | 1 | 2 | 3 |
| 11 Worry about money                       | 0 | 1 | 2 | 3 |
| 12 Covid-19                                | 0 | 1 | 2 | 3 |
| 13 Not allowed to get off the ship in port | 0 | 1 | 2 | 3 |
| 14 Seasickness                             | 0 | 1 | 2 | 3 |
| 15 No internet or limited internet access  | 0 | 1 | 2 | 3 |
| 16 Bad weather / rough sea                 | 0 | 1 | 2 | 3 |

| <b>27. Have you asked for help from feeling depressed to any of the following people?</b> |     |    |
|-------------------------------------------------------------------------------------------|-----|----|
| Friend                                                                                    | yes | no |
| Coworkers                                                                                 | yes | no |
| Family member                                                                             | yes | no |
| Medical doctor                                                                            | yes | no |
| Therapist                                                                                 | yes | no |
| Religious advisor/chaplain                                                                | yes | no |
| Other (please list)                                                                       |     |    |
| I have not asked for help                                                                 | yes | no |

#### **Part 4. Career Plans**

| <b>28. Are you thinking about leaving your job as a seafarer within a year?</b> |
|---------------------------------------------------------------------------------|
| Yes                                                                             |
| No                                                                              |

#### **Part 5. Internet Access**

| <b>29. Do you have regular internet access on any of the following places?</b> |
|--------------------------------------------------------------------------------|
| At sea never - rarely - often - most of the time                               |
| At port never - rarely - often - most of the time                              |
| At home never - rarely - often - most of the time                              |

| <b>30. When working at sea, how often do you have unrestricted access to the internet?</b> |
|--------------------------------------------------------------------------------------------|
| No restrictions, internet access at all times                                              |
| Internet access at all times, but network capacity is limited                              |
| More than one day each week                                                                |
| About one day each week                                                                    |
| About one day per month                                                                    |
| Other                                                                                      |

#### **Part 6. Company Policy Towards Mental Health Issues**

|                                                                      |
|----------------------------------------------------------------------|
| <b>31.Has your company ever given you training on mental health?</b> |
| Yes                                                                  |
| No                                                                   |

|                                                                                           |
|-------------------------------------------------------------------------------------------|
| <b>32.How many mental health training sessions the company has done in the past year?</b> |
| 0                                                                                         |
| 1                                                                                         |
| 2                                                                                         |
| 3&above                                                                                   |

|                                                                      |
|----------------------------------------------------------------------|
| <b>33.Does the company you work for have a mental health policy?</b> |
| Yes                                                                  |
| No                                                                   |
| Do not know                                                          |

|                                                                              |
|------------------------------------------------------------------------------|
| <b>34.Do you know what to do if you suspected a crew mate was depressed?</b> |
| Yes                                                                          |
| No                                                                           |
